# Supplementary material
Source: publisher figshare collection journal article supplement (https://asha.figshare.com/articles/dataset/_/24400066)
Supplement: Supplementary file 1 [file 1]

**Supplemental Material S3.** The SNR levels at which each of the 27 lists were tested for each subject, with the number of measurements at +1, –2, –5, respectively, and the total number of measurements at three SNR levels for each list.

| List number   | 1  | 2  | 3  | 4  | 5  | A  | B  | C  | D  | E  | F  | G  | H  | I  | J  | L  | M  | N  | O  | P  | R  | S  | T  | V  | W  | X  | Z  |
|---------------|----|----|----|----|----|----|----|----|----|----|----|----|----|----|----|----|----|----|----|----|----|----|----|----|----|----|----|
| subject 1/28  | +1 | –2 | –5 | +1 | –2 | –5 | +1 | –2 | –5 | +1 | –2 | –5 | +1 | –2 | –5 |    |    |    |    |    |    |    |    |    |    |    |    |
| subject 2/29  |    | +1 | –2 | –5 | +1 | –2 | –5 | +1 | –2 | –5 | +1 | –2 | –5 | +1 | –2 | –5 |    |    |    |    |    |    |    |    |    |    |    |
| subject 3/30  |    |    | +1 | –2 | –5 | +1 | –2 | –5 | +1 | –2 | –5 | +1 | –2 | –5 | +1 | –2 | –5 |    |    |    |    |    |    |    |    |    |    |
| subject 4/31  |    |    |    | +1 | –2 | –5 | +1 | –2 | –5 | +1 | –2 | –5 | +1 | –2 | –5 | +1 | –2 | –5 |    |    |    |    |    |    |    |    |    |
| subject 5/32  |    |    |    |    | +1 | –2 | –5 | +1 | –2 | –5 | +1 | –2 | –5 | +1 | –2 | –5 | +1 | –2 | –5 |    |    |    |    |    |    |    |    |
| subject 6/33  |    |    |    |    |    | +1 | –2 | –5 | +1 | –2 | –5 | +1 | –2 | –5 | +1 | –2 | –5 | +1 | –2 | –5 |    |    |    |    |    |    |    |
| subject 7/34  |    |    |    |    |    |    | +1 | –2 | –5 | +1 | –2 | –5 | +1 | –2 | –5 | +1 | –2 | –5 | +1 | –2 | –5 |    |    |    |    |    |    |
| subject 8/35  |    |    |    |    |    |    |    | +1 | –2 | –5 | +1 | –2 | –5 | +1 | –2 | –5 | +1 | –2 | –5 | +1 | –2 | –5 |    |    |    |    |    |
| subject 9/36  |    |    |    |    |    |    |    |    | +1 | –2 | –5 | +1 | –2 | –5 | +1 | –2 | –5 | +1 | –2 | –5 | +1 | –2 | –5 |    |    |    |    |
| subject 10/37 |    |    |    |    |    |    |    |    |    | +1 | –2 | –5 | +1 | –2 | –5 | +1 | –2 | –5 | +1 | –2 | –5 | +1 | –2 | –5 |    |    |    |
| subject 11/38 |    |    |    |    |    |    |    |    |    |    | +1 | –2 | –5 | +1 | –2 | –5 | +1 | –2 | –5 | +1 | –2 | –5 | +1 | –2 | –5 |    |    |
| subject 12/39 |    |    |    |    |    |    |    |    |    |    |    | +1 | –2 | –5 | +1 | –2 | –5 | +1 | –2 | –5 | +1 | –2 | –5 | +1 | –2 | –5 |    |
| subject 13/40 |    |    |    |    |    |    |    |    |    |    |    |    | +1 | –2 | –5 | +1 | –2 | –5 | +1 | –2 | –5 | +1 | –2 | –5 | +1 | –2 | –5 |
| subject 14/41 | –5 |    |    |    |    |    |    |    |    |    |    |    |    | +1 | –2 | –5 | +1 | –2 | –5 | +1 | –2 | –5 | +1 | –2 | –5 | +1 | –2 |
| subject 15/42 | –2 | –5 |    |    |    |    |    |    |    |    |    |    |    |    | +1 | –2 | –5 | +1 | –2 | –5 | +1 | –2 | –5 | +1 | –2 | –5 | +1 |
| subject 16/43 | +1 | –2 | –5 |    |    |    |    |    |    |    |    |    |    |    |    | +1 | –2 | –5 | +1 | –2 | –5 | +1 | –2 | –5 | +1 | –2 | –5 |
| subject 17/44 | –5 | +1 | –2 | –5 |    |    |    |    |    |    |    |    |    |    |    |    | +1 | –2 | –5 | +1 | –2 | –5 | +1 | –2 | –5 | +1 | –2 |
| subject 18/45 | –2 | –5 | +1 | –2 | –5 |    |    |    |    |    |    |    |    |    |    |    |    | +1 | –2 | –5 | +1 | –2 | –5 | +1 | –2 | –5 | +1 |
| subject 19/46 | +1 | –2 | –5 | +1 | –2 | –5 |    |    |    |    |    |    |    |    |    |    |    |    | +1 | –2 | –5 | +1 | –2 | –5 | +1 | –2 | –5 |

|                          |    |    |    |    |    |    |    |    |    |    |    |    |    |    |    |    |    |    |           |           |           |           |    |    |           |    |
|--------------------------|----|----|----|----|----|----|----|----|----|----|----|----|----|----|----|----|----|----|-----------|-----------|-----------|-----------|----|----|-----------|----|
| subject 20/47            | -5 | +1 | -2 | -5 | +1 | -2 | -5 |    |    |    |    |    |    |    |    |    |    |    | <b>+1</b> | -2        | -5        | +1        | -2 | -5 | +1        | -2 |
| subject 21/48            | -2 | -5 | +1 | -2 | -5 | +1 | -2 | -5 |    |    |    |    |    |    |    |    |    |    | <b>+1</b> | -2        | -5        | +1        | -2 | -5 | +1        |    |
| subject 22/49            | +1 | -2 | -5 | +1 | -2 | -5 | +1 | -2 | -5 |    |    |    |    |    |    |    |    |    | <b>+1</b> | -2        | -5        | +1        | -2 | -5 |           |    |
| subject 23/50            | -5 | +1 | -2 | -5 | +1 | -2 | -5 | +1 | -2 | -5 |    |    |    |    |    |    |    |    |           | <b>+1</b> | -2        | -5        | +1 | -2 |           |    |
| subject 24/51            | -2 | -5 | +1 | -2 | -5 | +1 | -2 | -5 | +1 | -2 | -5 |    |    |    |    |    |    |    |           | <b>+1</b> | -2        | -5        | +1 |    |           |    |
| subject 25/52            | +1 | -2 | -5 | +1 | -2 | -5 | +1 | -2 | -5 | +1 | -2 | -5 |    |    |    |    |    |    |           |           | <b>+1</b> | -2        | -5 |    |           |    |
| subject 26/53            | -5 | +1 | -2 | -5 | +1 | -2 | -5 | +1 | -2 | -5 | +1 | -2 | -5 |    |    |    |    |    |           |           |           | <b>+1</b> | -2 |    |           |    |
| subject 27/54            | -2 | -5 | +1 | -2 | -5 | +1 | -2 | -5 | +1 | -2 | -5 | +1 | -2 | -5 |    |    |    |    |           |           |           |           |    |    | <b>+1</b> |    |
| testings at +1<br>dB SNR | 10 | 10 | 10 | 10 | 10 | 10 | 10 | 10 | 10 | 10 | 10 | 10 | 10 | 10 | 10 | 10 | 10 | 10 | 10        | 10        | 10        | 10        | 10 | 10 | 10        | 10 |
| testings at -2<br>dB SNR | 10 | 10 | 10 | 10 | 10 | 10 | 10 | 10 | 10 | 10 | 10 | 10 | 10 | 10 | 10 | 10 | 10 | 10 | 10        | 10        | 10        | 10        | 10 | 10 | 10        | 10 |
| testings at -5<br>dB SNR | 10 | 10 | 10 | 10 | 10 | 10 | 10 | 10 | 10 | 10 | 10 | 10 | 10 | 10 | 10 | 10 | 10 | 10 | 10        | 10        | 10        | 10        | 10 | 10 | 10        | 10 |
| total testings           | 30 | 30 | 30 | 30 | 30 | 30 | 30 | 30 | 30 | 30 | 30 | 30 | 30 | 30 | 30 | 30 | 30 | 30 | 30        | 30        | 30        | 30        | 30 | 30 | 30        | 30 |

Note. Bold data represent lists tested as the first list for a particular subject, with other lists following in the sequence of list numbers.
