# Supplementary material
Source: publisher figshare collection journal article supplement (https://asha.figshare.com/articles/dataset/_/24400066)
Supplement: Supplementary file 2 [file 1]

**Supplemental Material S2.** The mean and SD of the 32 lists tested in NH adults at four SNRs. Lists that were significantly different from others according to ANOVA results were italicized.

| List number | SNR = -9 |       | SNR = -7 |        | SNR = -5 |        | SNR = -3 |       |
|-------------|----------|-------|----------|--------|----------|--------|----------|-------|
|             | Mean     | SD    | Mean     | SD     | Mean     | SD     | Mean     | SD    |
| 1           | 10.00%   | 3.79% | 24.13%   | 7.85%  | 70.75%   | 12.67% | 93.25%   | 2.91% |
| 2           | 10.50%   | 5.29% | 23.13%   | 4.95%  | 65.38%   | 7.89%  | 93.63%   | 4.57% |
| 3           | 7.75%    | 2.29% | 26.00%   | 11.89% | 71.63%   | 11.53% | 92.25%   | 5.60% |
| 4           | 9.38%    | 3.24% | 28.25%   | 8.42%  | 67.88%   | 11.42% | 89.00%   | 7.80% |
| 5           | 10.25%   | 3.86% | 23.75%   | 5.05%  | 72.38%   | 12.88% | 92.63%   | 7.33% |
| 6           | 11.38%   | 4.54% | 29.88%   | 8.66%  | 72.75%   | 9.09%  | 94.50%   | 4.65% |
| A           | 10.50%   | 3.14% | 29.00%   | 9.41%  | 68.88%   | 15.30% | 93.25%   | 7.15% |
| B           | 9.88%    | 6.67% | 26.75%   | 8.61%  | 73.88%   | 10.11% | 92.00%   | 4.90% |
| C           | 8.88%    | 4.56% | 27.00%   | 9.72%  | 72.75%   | 10.48% | 94.13%   | 4.03% |
| D           | 10.63%   | 4.94% | 27.50%   | 10.67% | 70.50%   | 8.08%  | 95.13%   | 3.65% |
| E           | 9.50%    | 4.23% | 28.88%   | 11.15% | 72.75%   | 12.24% | 90.13%   | 6.75% |
| F           | 9.13%    | 4.95% | 24.38%   | 10.13% | 68.25%   | 9.98%  | 92.63%   | 4.83% |
| G           | 10.63%   | 3.70% | 27.00%   | 7.34%  | 66.38%   | 11.25% | 89.63%   | 5.43% |
| H           | 8.50%    | 3.39% | 23.75%   | 5.60%  | 66.63%   | 9.57%  | 93.50%   | 7.61% |
| I           | 9.63%    | 2.75% | 26.75%   | 11.59% | 66.13%   | 15.17% | 91.00%   | 7.04% |
| J           | 10.50%   | 5.24% | 25.75%   | 9.12%  | 74.00%   | 8.20%  | 94.00%   | 3.65% |
| K           | 9.63%    | 5.52% | 28.13%   | 8.53%  | 78.25%   | 9.55%  | 96.88%   | 3.65% |
| L           | 11.00%   | 6.49% | 30.13%   | 11.28% | 73.50%   | 11.70% | 94.50%   | 5.73% |
| M           | 9.63%    | 3.52% | 26.00%   | 12.92% | 67.75%   | 12.35% | 91.88%   | 3.61% |
| N           | 9.50%    | 6.47% | 27.63%   | 13.05% | 72.00%   | 11.45% | 93.63%   | 4.75% |
| O           | 8.50%    | 2.97% | 22.63%   | 8.51%  | 70.00%   | 9.41%  | 92.88%   | 6.93% |
| P           | 6.50%    | 3.06% | 27.50%   | 8.90%  | 70.50%   | 12.36% | 97.25%   | 3.17% |
| Q           | 9.25%    | 3.42% | 30.88%   | 9.74%  | 76.38%   | 9.72%  | 96.88%   | 2.63% |
| R           | 8.25%    | 2.72% | 23.88%   | 9.02%  | 73.38%   | 11.09% | 92.25%   | 7.93% |
| S           | 9.38%    | 4.30% | 25.50%   | 9.08%  | 68.25%   | 6.57%  | 94.50%   | 7.10% |
| T           | 11.13%   | 6.32% | 26.75%   | 11.12% | 72.25%   | 9.74%  | 92.38%   | 4.51% |
| U           | 11.38%   | 8.66% | 31.63%   | 14.46% | 79.00%   | 9.44%  | 94.38%   | 4.01% |
| V           | 8.88%    | 2.42% | 23.13%   | 10.98% | 67.75%   | 16.05% | 91.88%   | 4.81% |
| W           | 7.50%    | 4.23% | 23.13%   | 7.00%  | 70.00%   | 6.15%  | 96.25%   | 4.37% |
| X           | 8.38%    | 2.85% | 30.75%   | 11.05% | 74.50%   | 14.47% | 94.25%   | 5.00% |
| Y           | 12.13%   | 4.76% | 28.50%   | 10.67% | 78.13%   | 9.22%  | 93.50%   | 3.69% |
| Z           | 7.75%    | 3.42% | 25.88%   | 9.97%  | 73.75%   | 10.30% | 91.75%   | 6.06% |
