# Supplementary material
Source: publisher figshare collection journal article supplement (https://asha.figshare.com/articles/dataset/_/24400066)
Supplement: Supplementary file 3 [file 1]

**Supplemental Material S4.** The mean and *SD* of the 27 lists tested in NH children at three SNRs.

| List<br>number | SNR = -5 |           | SNR = -2 |           | SNR = +1 |           |
|----------------|----------|-----------|----------|-----------|----------|-----------|
|                | Mean     | <i>SD</i> | Mean     | <i>SD</i> | Mean     | <i>SD</i> |
| 1              | 11.60%   | 6.31%     | 50.00%   | 10.67%    | 87.00%   | 8.39%     |
| 2              | 10.40%   | 6.17%     | 47.60%   | 9.47%     | 82.40%   | 7.76%     |
| 3              | 15.20%   | 8.44%     | 50.60%   | 6.93%     | 84.40%   | 6.17%     |
| 4              | 10.80%   | 4.64%     | 48.20%   | 11.09%    | 85.00%   | 8.18%     |
| 5              | 12.40%   | 4.97%     | 50.60%   | 11.12%    | 82.80%   | 9.72%     |
| A              | 11.80%   | 5.37%     | 46.00%   | 8.11%     | 88.00%   | 6.53%     |
| B              | 10.20%   | 6.14%     | 53.80%   | 8.35%     | 88.80%   | 5.09%     |
| C              | 11.20%   | 5.18%     | 51.60%   | 11.62%    | 89.00%   | 6.48%     |
| D              | 14.40%   | 4.50%     | 52.80%   | 8.50%     | 84.20%   | 4.66%     |
| E              | 11.40%   | 6.40%     | 50.00%   | 12.29%    | 87.40%   | 7.31%     |
| F              | 12.20%   | 5.03%     | 49.20%   | 10.25%    | 84.20%   | 8.46%     |
| G              | 17.00%   | 5.52%     | 48.80%   | 7.07%     | 84.60%   | 9.43%     |
| H              | 13.20%   | 6.81%     | 51.40%   | 12.55%    | 87.00%   | 4.24%     |
| I              | 11.60%   | 6.17%     | 57.20%   | 6.61%     | 85.60%   | 6.98%     |
| J              | 12.00%   | 6.25%     | 50.20%   | 9.16%     | 85.60%   | 6.98%     |
| L              | 13.60%   | 4.70%     | 53.00%   | 11.71%    | 91.00%   | 4.24%     |
| M              | 12.20%   | 7.51%     | 54.40%   | 8.93%     | 89.00%   | 5.98%     |
| N              | 11.80%   | 4.66%     | 44.60%   | 4.81%     | 85.00%   | 5.60%     |
| O              | 16.00%   | 4.99%     | 49.40%   | 10.07%    | 90.40%   | 6.59%     |
| P              | 10.60%   | 5.42%     | 52.80%   | 8.85%     | 87.40%   | 8.11%     |
| R              | 11.60%   | 4.40%     | 48.60%   | 13.00%    | 84.80%   | 6.88%     |
| S              | 12.40%   | 6.17%     | 47.00%   | 6.48%     | 86.60%   | 8.11%     |
| T              | 10.80%   | 5.01%     | 50.60%   | 9.00%     | 86.60%   | 6.11%     |
| V              | 10.20%   | 5.45%     | 46.00%   | 8.38%     | 82.60%   | 7.18%     |
| W              | 12.00%   | 5.08%     | 56.20%   | 7.51%     | 87.20%   | 8.12%     |
| X              | 12.80%   | 5.27%     | 43.60%   | 11.07%    | 82.40%   | 6.59%     |
| Z              | 12.80%   | 7.90%     | 46.20%   | 11.29%    | 82.00%   | 7.48%     |
