# Supplementary material
Source: publisher figshare collection journal article supplement (https://asha.figshare.com/articles/dataset/_/24400066)
Supplement: Supplementary file 4 [file 1]

**Supplemental Material S1.** The SNR levels at which each of the 32 lists were tested for each subject, with the number of measurements at  $-3$ ,  $-5$ ,  $-7$ ,  $-9$ , respectively, and the total number of measurements at four SNR levels for each list.

| List number | 1  | 2         | 3  | 4         | 5  | 6         | A  | B         | C         | D         | E  | F         | G         | H  | I         | J  | K         | L         | M         | N         | O  | P  | Q         | R         | S  | T  | U  | V         | W         | X         | Y         | Z         |
|-------------|----|-----------|----|-----------|----|-----------|----|-----------|-----------|-----------|----|-----------|-----------|----|-----------|----|-----------|-----------|-----------|-----------|----|----|-----------|-----------|----|----|----|-----------|-----------|-----------|-----------|-----------|
| subject 1   | -3 | -9        | -7 | -5        | -3 | -9        | -5 | -7        | -3        | -9        | -5 | -7        | -3        | -9 | <b>-5</b> | -7 | -3        | -9        | -5        | -7        | -5 | -9 | -5        | -3        | -9 | -7 | -3 | -5        | -9        | -7        | -3        | -7        |
| subject 2   | -5 | -3        | -9 | -7        | -5 | -3        | -7 | -9        | -5        | -3        | -7 | -9        | <b>-5</b> | -3 | -7        | -9 | -5        | -3        | -7        | -9        | -7 | -3 | -7        | -5        | -3 | -9 | -5 | -7        | -3        | -9        | -5        | -9        |
| subject 3   | -9 | -7        | -5 | -3        | -9 | -7        | -3 | -5        | -9        | -7        | -3 | -5        | -9        | -7 | -3        | -5 | -9        | -7        | -3        | <b>-5</b> | -3 | -7 | -3        | -9        | -7 | -5 | -9 | -3        | -7        | -5        | -9        | -5        |
| subject 4   | -3 | -9        | -7 | <b>-5</b> | -3 | -9        | -5 | -7        | -3        | -9        | -5 | -7        | -3        | -9 | -5        | -7 | -3        | -9        | -5        | -7        | -5 | -9 | -5        | -3        | -9 | -7 | -3 | -5        | -9        | -7        | -3        | -7        |
| subject 5   | -5 | -3        | -9 | -7        | -5 | -3        | -7 | -9        | -5        | -3        | -7 | -9        | -5        | -3 | -7        | -9 | -5        | -3        | -7        | -9        | -7 | -3 | -7        | -5        | -3 | -9 | -5 | -7        | -3        | -9        | <b>-5</b> | -9        |
| subject 6   | -7 | <b>-5</b> | -3 | -9        | -7 | -5        | -9 | -3        | -7        | -5        | -9 | -3        | -7        | -5 | -9        | -3 | -7        | -5        | -9        | -3        | -9 | -5 | -9        | -7        | -5 | -3 | -7 | -9        | -5        | -3        | -7        | -3        |
| subject 7   | -9 | -7        | -5 | -3        | -9 | -7        | -3 | -5        | -9        | -7        | -3 | -5        | -9        | -7 | -3        | -5 | -9        | -7        | -3        | -5        | -3 | -7 | -3        | -9        | -7 | -5 | -9 | -3        | -7        | <b>-5</b> | -9        | -5        |
| subject 8   | -7 | -5        | -3 | -9        | -7 | -5        | -9 | -3        | -7        | -5        | -9 | -3        | -7        | -5 | -9        | -3 | -7        | <b>-5</b> | -9        | -3        | -9 | -5 | -9        | -7        | -5 | -3 | -7 | -9        | -5        | -3        | -7        | -3        |
| subject 9   | -5 | -3        | -9 | -7        | -5 | -3        | -7 | -9        | <b>-5</b> | -3        | -7 | -9        | -5        | -3 | -7        | -9 | -5        | -3        | -7        | -9        | -7 | -3 | -7        | -5        | -3 | -9 | -5 | -7        | -3        | -9        | -5        | -9        |
| subject 10  | -3 | -9        | -7 | -5        | -3 | -9        | -5 | -7        | -3        | -9        | -5 | -7        | -3        | -9 | -5        | -7 | -3        | -9        | -5        | -7        | -5 | -9 | <b>-5</b> | -3        | -9 | -7 | -3 | -5        | -9        | -7        | -3        | -7        |
| subject 11  | -7 | -5        | -3 | -9        | -7 | <b>-5</b> | -9 | -3        | -7        | -5        | -9 | -3        | -7        | -5 | -9        | -3 | -7        | -5        | -9        | -3        | -9 | -5 | -9        | -7        | -5 | -3 | -7 | -9        | -5        | -3        | -7        | -3        |
| subject 12  | -9 | -7        | -5 | -3        | -9 | -7        | -3 | <b>-5</b> | -9        | -7        | -3 | -5        | -9        | -7 | -3        | -5 | -9        | -7        | -3        | -5        | -3 | -7 | -3        | -9        | -7 | -5 | -9 | -3        | -7        | -5        | -9        | -5        |
| subject 13  | -3 | -9        | -7 | -5        | -3 | -9        | -5 | -7        | -3        | -9        | -5 | -7        | -3        | -9 | -5        | -7 | -3        | -9        | -5        | -7        | -5 | -9 | -5        | -3        | -9 | -7 | -3 | <b>-5</b> | -9        | -7        | -3        | -7        |
| subject 14  | -7 | -5        | -3 | -9        | -7 | -5        | -9 | -3        | -7        | <b>-5</b> | -9 | -3        | -7        | -5 | -9        | -3 | -7        | -5        | -9        | -3        | -9 | -5 | -9        | -7        | -5 | -3 | -7 | -9        | -5        | -3        | -7        | -3        |
| subject 15  | -9 | -7        | -5 | -3        | -9 | -7        | -3 | -5        | -9        | -7        | -3 | -5        | -9        | -7 | -3        | -5 | -9        | -7        | -3        | -5        | -3 | -7 | -3        | -9        | -7 | -5 | -9 | -3        | -7        | -5        | -9        | <b>-5</b> |
| subject 16  | -5 | -3        | -9 | -7        | -5 | -3        | -7 | -9        | -5        | -3        | -7 | -9        | -5        | -3 | -7        | -9 | <b>-5</b> | -3        | -7        | -9        | -7 | -3 | -7        | -5        | -3 | -9 | -5 | -7        | -3        | -9        | -5        | -9        |
| subject 17  | -3 | -9        | -7 | -5        | -3 | -9        | -5 | -7        | -3        | -9        | -5 | -7        | -3        | -9 | -5        | -7 | -3        | -9        | <b>-5</b> | -7        | -5 | -9 | -5        | -3        | -9 | -7 | -3 | -5        | -9        | -7        | -3        | -7        |
| subject 18  | -5 | -3        | -9 | -7        | -5 | -3        | -7 | -9        | -5        | -3        | -7 | -9        | -5        | -3 | -7        | -9 | -5        | -3        | -7        | -9        | -7 | -3 | -7        | <b>-5</b> | -3 | -9 | -5 | -7        | -3        | -9        | -5        | -9        |
| subject 19  | -7 | -5        | -3 | -9        | -7 | -5        | -9 | -3        | -7        | -5        | -9 | -3        | -7        | -5 | -9        | -3 | -7        | -5        | -9        | -3        | -9 | -5 | -9        | -7        | -5 | -3 | -7 | -9        | <b>-5</b> | -3        | -7        | -3        |
| subject 20  | -9 | -7        | -5 | -3        | -9 | -7        | -3 | -5        | -9        | -7        | -3 | <b>-5</b> | -9        | -7 | -3        | -5 | -9        | -7        | -3        | -5        | -3 | -7 | -3        | -9        | -7 | -5 | -9 | -3        | -7        | -5        | -9        | -5        |

|            |           |    |           |    |           |    |           |    |    |    |           |    |    |           |    |           |    |    |    |    |           |           |    |           |           |           |           |    |    |    |    |    |
|------------|-----------|----|-----------|----|-----------|----|-----------|----|----|----|-----------|----|----|-----------|----|-----------|----|----|----|----|-----------|-----------|----|-----------|-----------|-----------|-----------|----|----|----|----|----|
| subject 21 | -3        | -9 | -7        | -5 | -3        | -9 | -5        | -7 | -3 | -9 | <b>-5</b> | -7 | -3 | -9        | -5 | -7        | -3 | -9 | -5 | -7 | -5        | -9        | -5 | -3        | -9        | -7        | -3        | -5 | -9 | -7 | -3 | -7 |
| subject 22 | -7        | -5 | -3        | -9 | -7        | -5 | -9        | -3 | -7 | -5 | -9        | -3 | -7 | -5        | -9 | -3        | -7 | -5 | -9 | -3 | -9        | -5        | -9 | -7        | <b>-5</b> | -3        | -7        | -9 | -5 | -3 | -7 | -3 |
| subject 23 | -5        | -3 | -9        | -7 | <b>-5</b> | -3 | -7        | -9 | -5 | -3 | -7        | -9 | -5 | -3        | -7 | -9        | -5 | -3 | -7 | -9 | -7        | -3        | -7 | -5        | -3        | -9        | -5        | -7 | -3 | -9 | -5 | -9 |
| subject 24 | -9        | -7 | -5        | -3 | -9        | -7 | -3        | -5 | -9 | -7 | -3        | -5 | -9 | -7        | -3 | -5        | -9 | -7 | -3 | -5 | -3        | -7        | -3 | -9        | -7        | <b>-5</b> | -9        | -3 | -7 | -5 | -9 | -5 |
| subject 25 | -3        | -9 | -7        | -5 | -3        | -9 | <b>-5</b> | -7 | -3 | -9 | -5        | -7 | -3 | -9        | -5 | -7        | -3 | -9 | -5 | -7 | -5        | -9        | -5 | -3        | -9        | -7        | -3        | -5 | -9 | -7 | -3 | -7 |
| subject 26 | -7        | -5 | -3        | -9 | -7        | -5 | -9        | -3 | -7 | -5 | -9        | -3 | -7 | -5        | -9 | -3        | -7 | -5 | -9 | -3 | -9        | <b>-5</b> | -9 | -7        | -5        | -3        | -7        | -9 | -5 | -3 | -7 | -3 |
| subject 27 | -5        | -3 | -9        | -7 | -5        | -3 | -7        | -9 | -5 | -3 | -7        | -9 | -5 | -3        | -7 | -9        | -5 | -3 | -7 | -9 | -7        | -3        | -7 | -5        | -3        | -9        | <b>-5</b> | -7 | -3 | -9 | -5 | -9 |
| subject 28 | -9        | -7 | -5        | -3 | -9        | -7 | -3        | -5 | -9 | -7 | -3        | -5 | -9 | -7        | -3 | <b>-5</b> | -9 | -7 | -3 | -5 | -3        | -7        | -3 | -9        | -7        | -5        | -9        | -3 | -7 | -5 | -9 | -5 |
| subject 29 | <b>-5</b> | -3 | -9        | -7 | -5        | -3 | -7        | -9 | -5 | -3 | -7        | -9 | -5 | -3        | -7 | -9        | -5 | -3 | -7 | -9 | -7        | -3        | -7 | -5        | -3        | -9        | -5        | -7 | -3 | -9 | -5 | -9 |
| subject 30 | -3        | -9 | -7        | -5 | -3        | -9 | -5        | -7 | -3 | -9 | -5        | -7 | -3 | -9        | -5 | -7        | -3 | -9 | -5 | -7 | <b>-5</b> | -9        | -5 | -3        | -9        | -7        | -3        | -5 | -9 | -7 | -3 | -7 |
| subject 31 | -7        | -5 | -3        | -9 | -7        | -5 | -9        | -3 | -7 | -5 | -9        | -3 | -7 | <b>-5</b> | -9 | -3        | -7 | -5 | -9 | -3 | -9        | -5        | -9 | -7        | -5        | -3        | -7        | -9 | -5 | -3 | -7 | -3 |
| subject 32 | -9        | -7 | <b>-5</b> | -3 | -9        | -7 | -3        | -5 | -9 | -7 | -3        | -5 | -9 | -7        | -3 | -5        | -9 | -7 | -3 | -5 | -3        | -7        | -3 | -9        | -7        | -5        | -9        | -3 | -7 | -5 | -9 | -5 |
| subject 33 | -3        | -9 | -7        | -5 | -3        | -9 | -5        | -7 | -3 | -9 | -5        | -7 | -3 | -9        | -5 | -7        | -3 | -9 | -5 | -7 | <b>-5</b> | -9        | -5 | -3        | -9        | -7        | -3        | -5 | -9 | -7 | -3 | -7 |
| subject 34 | <b>-5</b> | -3 | -9        | -7 | -5        | -3 | -7        | -9 | -5 | -3 | -7        | -9 | -5 | -3        | -7 | -9        | -5 | -3 | -7 | -9 | -7        | -3        | -7 | -5        | -3        | -9        | -5        | -7 | -3 | -9 | -5 | -9 |
| subject 35 | -9        | -7 | <b>-5</b> | -3 | -9        | -7 | -3        | -5 | -9 | -7 | -3        | -5 | -9 | -7        | -3 | -5        | -9 | -7 | -3 | -5 | -3        | -7        | -3 | -9        | -7        | -5        | -9        | -3 | -7 | -5 | -9 | -5 |
| subject 36 | -3        | -9 | -7        | -5 | -3        | -9 | <b>-5</b> | -7 | -3 | -9 | -5        | -7 | -3 | -9        | -5 | -7        | -3 | -9 | -5 | -7 | -5        | -9        | -5 | -3        | -9        | -7        | -3        | -5 | -9 | -7 | -3 | -7 |
| subject 37 | -5        | -3 | -9        | -7 | -5        | -3 | -7        | -9 | -5 | -3 | -7        | -9 | -5 | -3        | -7 | -9        | -5 | -3 | -7 | -9 | -7        | -3        | -7 | -5        | -3        | -9        | <b>-5</b> | -7 | -3 | -9 | -5 | -9 |
| subject 38 | -7        | -5 | -3        | -9 | -7        | -5 | -9        | -3 | -7 | -5 | -9        | -3 | -7 | <b>-5</b> | -9 | -3        | -7 | -5 | -9 | -3 | -9        | -5        | -9 | -7        | -5        | -3        | -7        | -9 | -5 | -3 | -7 | -3 |
| subject 39 | -9        | -7 | -5        | -3 | -9        | -7 | -3        | -5 | -9 | -7 | -3        | -5 | -9 | -7        | -3 | <b>-5</b> | -9 | -7 | -3 | -5 | -3        | -7        | -3 | -9        | -7        | -5        | -9        | -3 | -7 | -5 | -9 | -5 |
| subject 40 | -7        | -5 | -3        | -9 | -7        | -5 | -9        | -3 | -7 | -5 | -9        | -3 | -7 | -5        | -9 | -3        | -7 | -5 | -9 | -3 | -9        | <b>-5</b> | -9 | -7        | -5        | -3        | -7        | -9 | -5 | -3 | -7 | -3 |
| subject 41 | -5        | -3 | -9        | -7 | -5        | -3 | -7        | -9 | -5 | -3 | -7        | -9 | -5 | -3        | -7 | -9        | -5 | -3 | -7 | -9 | -7        | -3        | -7 | <b>-5</b> | -3        | -9        | -5        | -7 | -3 | -9 | -5 | -9 |
| subject 42 | -3        | -9 | -7        | -5 | -3        | -9 | -5        | -7 | -3 | -9 | <b>-5</b> | -7 | -3 | -9        | -5 | -7        | -3 | -9 | -5 | -7 | -5        | -9        | -5 | -3        | -9        | -7        | -3        | -5 | -9 | -7 | -3 | -7 |
| subject 43 | -7        | -5 | -3        | -9 | -7        | -5 | -9        | -3 | -7 | -5 | -9        | -3 | -7 | -5        | -9 | -3        | -7 | -5 | -9 | -3 | -9        | -5        | -9 | -7        | <b>-5</b> | -3        | -7        | -9 | -5 | -3 | -7 | -3 |

[illegible]

|                          |    |    |    |    |    |    |    |    |    |    |    |    |    |    |    |    |    |    |    |    |    |    |    |    |    |    |    |    |    |    |
|--------------------------|----|----|----|----|----|----|----|----|----|----|----|----|----|----|----|----|----|----|----|----|----|----|----|----|----|----|----|----|----|----|
| testings at –5<br>dB SNR | 16 | 16 | 16 | 16 | 16 | 16 | 16 | 16 | 16 | 16 | 16 | 16 | 16 | 16 | 16 | 16 | 16 | 16 | 16 | 16 | 16 | 16 | 16 | 16 | 16 | 16 | 16 | 16 | 16 | 16 |
| testings at –7<br>dB SNR | 16 | 16 | 16 | 16 | 16 | 16 | 16 | 16 | 16 | 16 | 16 | 16 | 16 | 16 | 16 | 16 | 16 | 16 | 16 | 16 | 16 | 16 | 16 | 16 | 16 | 16 | 16 | 16 | 16 | 16 |
| testings at –9<br>dB SNR | 16 | 16 | 16 | 16 | 16 | 16 | 16 | 16 | 16 | 16 | 16 | 16 | 16 | 16 | 16 | 16 | 16 | 16 | 16 | 16 | 16 | 16 | 16 | 16 | 16 | 16 | 16 | 16 | 16 | 16 |
| total testings           | 64 | 64 | 64 | 64 | 64 | 64 | 64 | 64 | 64 | 64 | 64 | 64 | 64 | 64 | 64 | 64 | 64 | 64 | 64 | 64 | 64 | 64 | 64 | 64 | 64 | 64 | 64 | 64 | 64 | 64 |

Note. Bold data represent lists tested as the first list for a particular subject, with other lists following in the sequence of list numbers.
